# Supplementary material for: Outcomes of bicanalicular nasal stent inserted by sheath-guided dacryoendoscope in patients with lacrimal passage obstruction: a retrospective observational study
Source: Springer Nature journal article supplement (doi:10.1186/s12886-020-01678-5), 2021-02-25
Supplement: MOESM1 [file 18903712]

1. Has the result of the operation/intervention affected the things you do?

|            |                            |           |                             |             |
|------------|----------------------------|-----------|-----------------------------|-------------|
| Much worse | A little or somewhat worse | No change | A little or somewhat better | Much better |
| 1          | 2                          | 3         | 4                           | 5           |

2. Have the results of the operation/intervention made your overall life better or worse?

|             |                             |           |                            |            |
|-------------|-----------------------------|-----------|----------------------------|------------|
| Much better | A little or somewhat better | No change | A little or somewhat worse | Much worse |
| 5           | 4                           | 3         | 2                          | 1          |

3. Since your operation/intervention, have you felt more or less optimistic about the future?

|                      |                 |           |                 |                      |
|----------------------|-----------------|-----------|-----------------|----------------------|
| Much more optimistic | More optimistic | No change | Less optimistic | Much less optimistic |
| 5                    | 4               | 3         | 2               | 1                    |

4. Since your operation/intervention, do you feel more or less embarrassed when with a group of people?

|                       |                  |           |                  |                       |
|-----------------------|------------------|-----------|------------------|-----------------------|
| Much more embarrassed | More embarrassed | No change | Less embarrassed | Much less embarrassed |
| 1                     | 2                | 3         | 4                | 5                     |

5. Since your operation/intervention, do you have more or less self-confidence?

|                           |                      |           |                      |                           |
|---------------------------|----------------------|-----------|----------------------|---------------------------|
| Much more self-confidence | More self-confidence | No change | Less self-confidence | Much less self-confidence |
| 5                         | 4                    | 3         | 2                    | 1                         |

6. Since your operation/intervention, have you found it easier or harder to deal with company?

|             |        |           |        |             |
|-------------|--------|-----------|--------|-------------|
| Much easier | Easier | No change | Harder | Much harder |
| 5           | 4      | 3         | 2      | 1           |

7. Since your operation/intervention, do you feel that you have more or less support from your friends?

|                   |              |           |              |                   |
|-------------------|--------------|-----------|--------------|-------------------|
| Much more support | More support | No change | Less support | Much less support |
| 5                 | 4            | 3         | 2            | 1                 |

8. Have you been to your family doctor, for any reason, more or less often, since your operation/intervention?

|                 |            |           |            |                 |
|-----------------|------------|-----------|------------|-----------------|
| Much more often | More often | No change | Less often | Much less often |
| 1               | 2          | 3         | 4          | 5               |

9. Since your operation/intervention, do you feel more or less confident about job opportunities?

|                     |                |           |                |                     |
|---------------------|----------------|-----------|----------------|---------------------|
| Much more confident | More confident | No change | Less confident | Much less confident |
| 5                   | 4              | 3         | 2              | 1                   |

10. Since your operation/intervention, do you feel more or less self-conscious?

|                          |                     |           |                     |                          |
|--------------------------|---------------------|-----------|---------------------|--------------------------|
| Much more self-conscious | More self-conscious | No change | Less self-conscious | Much less self-conscious |
| 1                        | 2                   | 3         | 4                   | 5                        |

11. Since your operation/intervention, are there more or fewer people who really care about you?

|                  |             |           |              |                   |
|------------------|-------------|-----------|--------------|-------------------|
| Many more people | More people | No change | Fewer people | Many fewer people |
| 5                | 4           | 3         | 2            | 1                 |

12. Since you had the operation/intervention, do you catch colds or infections more or less often?

|                 |            |           |            |                 |
|-----------------|------------|-----------|------------|-----------------|
| Much more often | More often | No change | Less often | Much less often |
| 1               | 2          | 3         | 4          | 5               |

13. Have you had to take more or less medicine for any reason, since your operation/intervention?

|                    |               |           |               |                    |
|--------------------|---------------|-----------|---------------|--------------------|
| Much more medicine | More medicine | No change | Less medicine | Much less medicine |
| 1                  | 2             | 3         | 4             | 5                  |

14. Since your operation/intervention, do you feel better or worse about yourself?

|             |        |           |       |            |
|-------------|--------|-----------|-------|------------|
| Much better | Better | No change | Worse | Much worse |
| 5           | 4      | 3         | 2     | 1          |

15. Since your operation/intervention, do you feel that you have had more or less support from your family?

|                   |              |           |              |                   |
|-------------------|--------------|-----------|--------------|-------------------|
| Much more support | More support | No change | Less support | Much less support |
| 5                 | 4            | 3         | 2            | 1                 |

16. Since your operation/intervention, are you more or less inconvenienced by your health problem?

|                          |                     |           |                     |                          |
|--------------------------|---------------------|-----------|---------------------|--------------------------|
| Much more inconvenienced | More inconvenienced | No change | Less inconvenienced | Much less inconvenienced |
| 1                        | 2                   | 3         | 4                   | 5                        |

17. Since your operation/intervention, have you been able to participate in more or fewer social activities?

|                      |                 |           |                  |                       |
|----------------------|-----------------|-----------|------------------|-----------------------|
| Many more activities | More activities | No change | Fewer activities | Many fewer activities |
| 5                    | 4               | 3         | 2                | 1                     |

18. Since your operation/intervention, have you been more or less inclined to withdraw from social situations?

|                    |               |           |               |                    |
|--------------------|---------------|-----------|---------------|--------------------|
| Much more inclined | More inclined | No change | Less inclined | Much less inclined |
| 1                  | 2             | 3         | 4             | 5                  |
